# Supplementary material
Source: HighWire-hosted journal article supplement (https://www.jneurosci.org/highwire/filestream/600415/field_highwire_adjunct_files/0/Supplemental_Figures.pdf)
Supplement: Supplemental_Figures.pdf [file Supplemental_Figures.pdf]

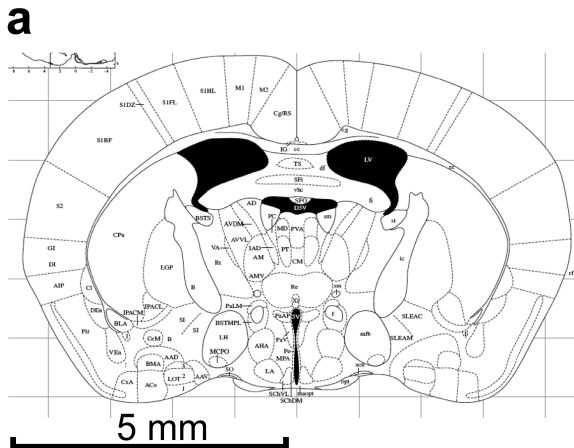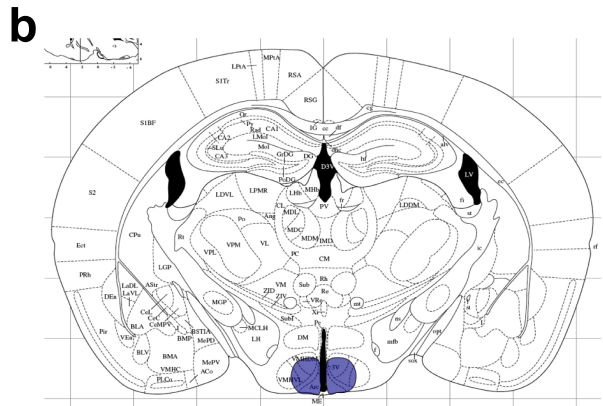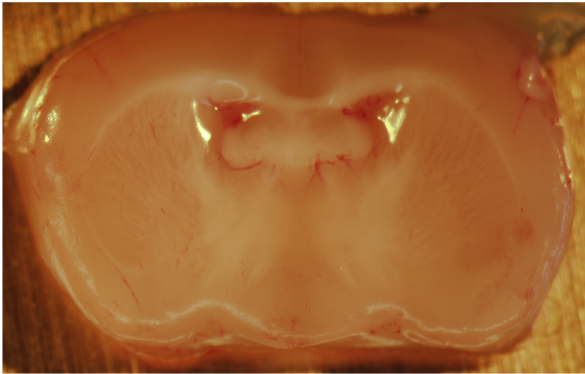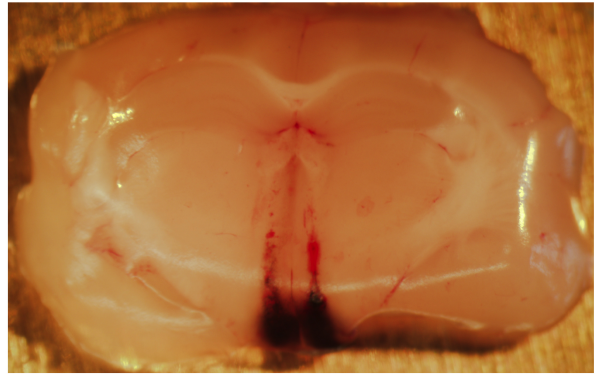

Supplemental Figure 1: MBH injection site specificity in mouse. (a) PVN and (b) MBH schematic (Paxinos and Franklin, 2001) and corresponding photographs of dissected sections following a 100 nl injection of india ink into the MBH (PVN section: 0.45 to -1.25 mm posterior to bregma ;MBH section: -1.25 to -2.05 mm posterior to bregma). Arc: arcuate nucleus of the hypothalamus, DM: dorsomedial hypothalamus, LH: lateral hypothalamus, ME: median eminence, PaV: paraventricular nucleus of the hypothalamus, VMH: ventromedial hypothalamus.

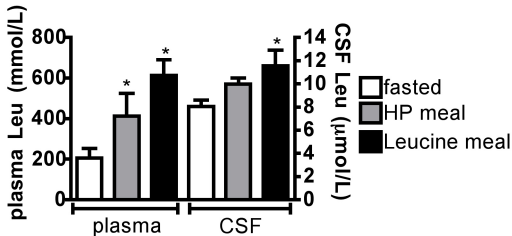

### Supplementary Figure 2: Dietary leucine rapidly increases plasma and CSF leucine concentration in rat.

Plasma and CSF leucine concentration in rat following a 24h fast (n=4) and 1h refeeding with a high-protein meal (n=4) or a standard chow 4% leucine-enriched meal (n=4). Data are means  $\pm$  SEM. \*: P<0.05 vs. fasted group

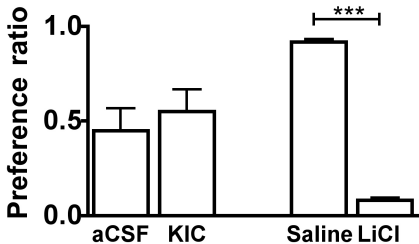

**Supplementary Figure 3: icv KIC does not induce a conditioned taste aversion in rat.** Preference ratio of drug-paired flavored water during a 2h conditioned taste aversion. Data are means  $\pm$  SEM, n=4. \*\*\*: P<0.001 vs. saline.

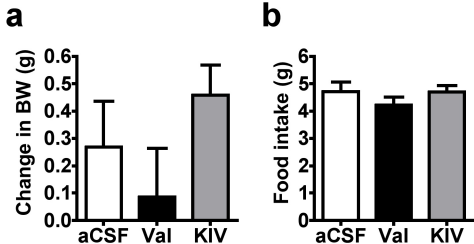

**Supplementary Figure 4: MBH valine and KIV injections do not affect food intake and body weight in rat.**

**(a)** 24h change in body weight and **(b)** 24h food intake in rat ( $n=8-10$ ) following an MBH injection of 200  $\mu$ l of aCSF, valine or KIV (injection design 1). Data are means  $\pm$  SEM.



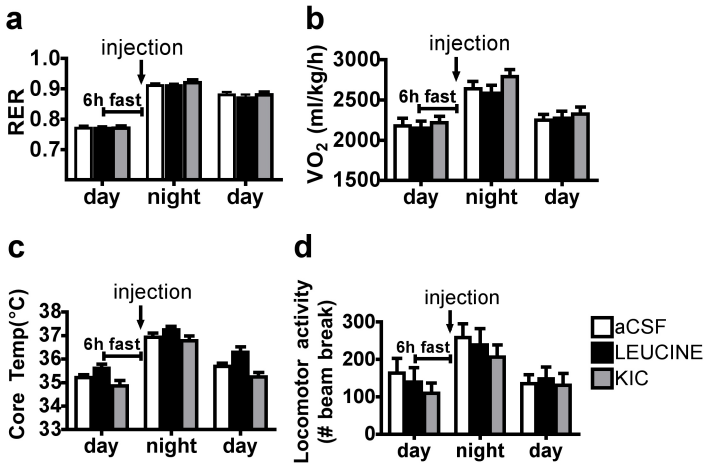

**Supplementary figure 5: MBH Leucine and KIC injection do not affect energy expenditure in mouse.**

(a) respiratory quotient, (b) oxygen consumption, (c) core temperature and (d) locomotor activity in mouse (n=8) following an MBH injection of aCSF, Leucine or KIC (injection design 1). Data are means  $\pm$  SEM.

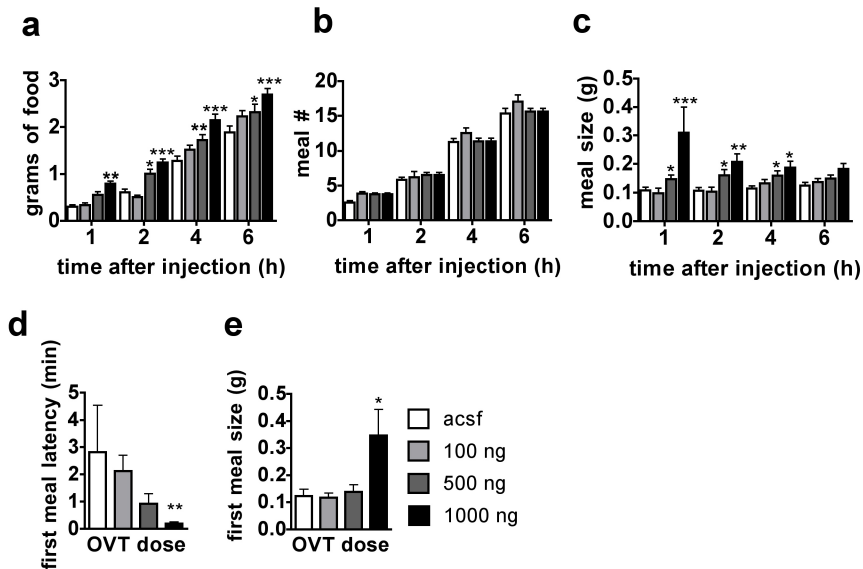

**Supplementary figure 6: IV<sup>th</sup> icv OVT dose-dependently increases food intake in mouse.**

(a) cumulative food intake, (b) cumulative meal number, (c) mean meal size, (d) first meal latency and (e) first meal size in mice (n=9) following a IV<sup>th</sup> icv injection of oxytocin receptor antagonist OVT (injection design 4). Data are means  $\pm$  SEM. \*: P<0.05 vs. aCSF ; \*\*: P<0.01 vs. aCSF ; \*\*\*: P<0.001 vs. aCSF .

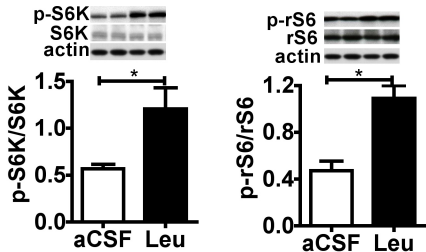

**Supplementary figure 7: MBH Leucine activates MBH p70 S6 kinase1 pathway.** MBH p70 S6 kinase1 Thr389 phosphorylation and S6 ribosomal protein Ser235/236 phosphorylation in mouse 45 min after an MBH injection of aCSF (n=4) or leucine (n=4-5) (injection design 1). All data are means  $\pm$  SEM. \*: P<0.05 vs. aCSF.

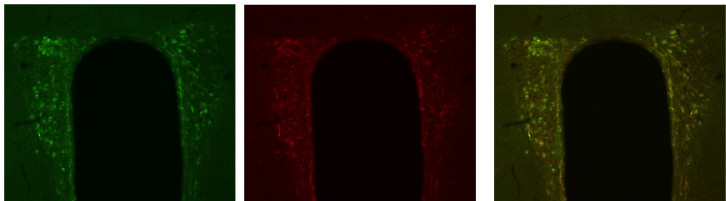

**Supplementary figure 8: Refeeding rapidly activates Erk1/2 signaling in PVN oxytocin neurons.**

Immunofluorescence showing colocalization (yellow, right) of oxytocin (Cy2, green, left) and phospho- Thr202/Tyr204 Erk 1/2 (Cy3, red, middle) in PVN slices of mice immediately after 60 min refeeding a standard-chow meal following an overnight fast.

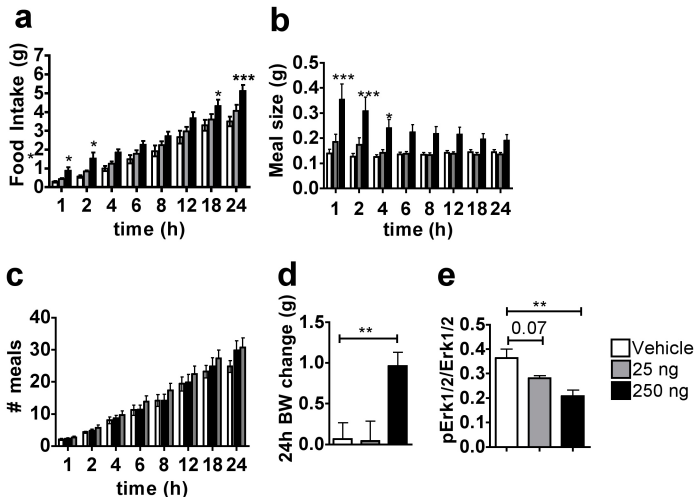

### Supplementary figure 9: MBH U0126 increases food intake and body weight in mouse.

(a) cumulative food intake, (b) mean meal size, (c) cumulative meal number, (d) 24h body weight change and (e) MBH Erk 1/2 Thr202/Tyr204 phosphorylation in mouse (n=6 to 11) following an MBH administration of MEK inhibitor U0126 (injection design 6). Data are means  $\pm$  SEM. \*: P<0.05 vs. aCSF ; \*\*: P<0.01 vs. aCSF ; \*\*\*: P<0.001 vs. aCSF .
